# Supplementary material for: Wetland Loss in Coastal Louisiana Drives Significant Resident Population Declines
Source: Preprints.org preprint supplement (doi:10.20944/preprints202305.0341.v1), 2023-05-05
Supplement: Supplementary file 1 [file supplementary]

**Supplementary Information**

Table S1.

| **Parish** | **Additional Population in 2021 with no wetland loss from 1990 to 2021**  **(# of persons)** | **Additional Population in 2021 with no wetland loss from 1990 to 2021**  **(%)** | **Mean change in population growth by 1 hectare of wetland loss**  **(Percent points)** | **Mean loss of population per hectare of wetland loss**  **(# of persons)** | **Wetland lost to water from 1990 to 2021**  **(hectares)** |
| --- | --- | --- | --- | --- | --- |
| Cameron | 3186.17 | 62.72 | -0.64 | -5.97 | 453.12 |
| Iberia | 1760.14 | 2.55 | -4.14 | -28.63 | 31.31 |
| Jefferson | 35445.19 | 8.17 | -3.88 | -886.63 | 47.13 |
| Lafourche | 10329.04 | 10.59 | -1.14 | -19.33 | 134.46 |
| Orleans | 29345.92 | 7.78 | -11.59 | -9252.42 | 26.99 |
| Plaquemines | 35961.25 | 154.32 | -0.47 | -23.53 | 455.42 |
| St. Bernard | 110321.30 | 249.26 | -2.87 | -868.89 | 95.35 |
| St. Charles | 4447.78 | 8.507 | -5.70 | -92.48 | 26.03 |
| St. John the Baptist | 577.68 | 1.37 | -34.79 | -581.79 | 4.09 |
| St. Mary | 2553.73 | 5.29 | -2.98 | -32.07 | 49.24 |
| St. Tammany | 4143.46 | 1.53 | -8.54 | -1377.47 | 45.54 |
| Terrebonne | 54607.52 | 50.23 | -0.44 | -31.38 | 334.97 |
| Vermilion | 1991.40 | 3.48 | -2.32 | -10.99 | 117.28 |
